# Supplementary material
Source: PubMed Central journal article supplement (PMC5331667)
Supplement: JB.00841-16_zjb999094340s1.pdf [file JB.00841-16_zjb999094340s1.pdf]

**Table S1.** Primer sequences used for real time RT-PCR analyses of expression of different *vir* genes and the internal control gene for 16S RNA

| Gene         | Primer name              | Primer sequence (5'→3') |
|--------------|--------------------------|-------------------------|
| <i>virB2</i> | LY_RtetlivirB2For        | TTGTCATCTGCCTGGTTCGAG   |
|              | LY_RtetlivirB2Rev        | GTAGCCAAACATCCAGGCGA    |
| <i>virB4</i> | LY_RtetlivirB4For        | CCCTGCTGTCCCTCGATTTT    |
|              | LY_RtetlivirB4Rev        | TTGTCGCCGGAACCTAGCAT    |
| <i>virB5</i> | LY_RtetlivirB5For        | AAAACCAGTATCCCGCCACG    |
|              | LY_RtetlivirB5Rev        | GCTTCAGCGTCACTACCAGT    |
| <i>virD2</i> | LY_RtetlivirD2For        | AGCCGAGATGTTTGGGTCAG    |
|              | LY_RtetlivirD2Rev        | CGTAAGTCATCGGACGCTCA    |
| <i>virE2</i> | LY_RtetlivirE2For        | AGTCCTTTGCGGAGTTCGAG    |
|              | LY_RtetlivirE2Rev        | ATCGACGCTAACGAAGCGAT    |
| <i>virG</i>  | LY_RtetlivirGFor         | TGGAAGAAGCGGACAAGGTC    |
|              | LY_RtetlivirGRev         | AAGTGTCCAGCCGTCGAAAT    |
| 16S RNA      | LY_RHE_CH00059 (16S) Fwd | TCCACGCCGTAAACGATGA     |
|              | LY_RHE_CH00059 (16S) Rev | TGCGCCACCGAACAGTATAC    |
